# Supplementary material for: Comparison of rule- and ordinary differential equation-based dynamic model of DARPP-32 signalling network
Source: PeerJ journal article supplement (doi:10.7717/peerj.14516), 2022-12-15

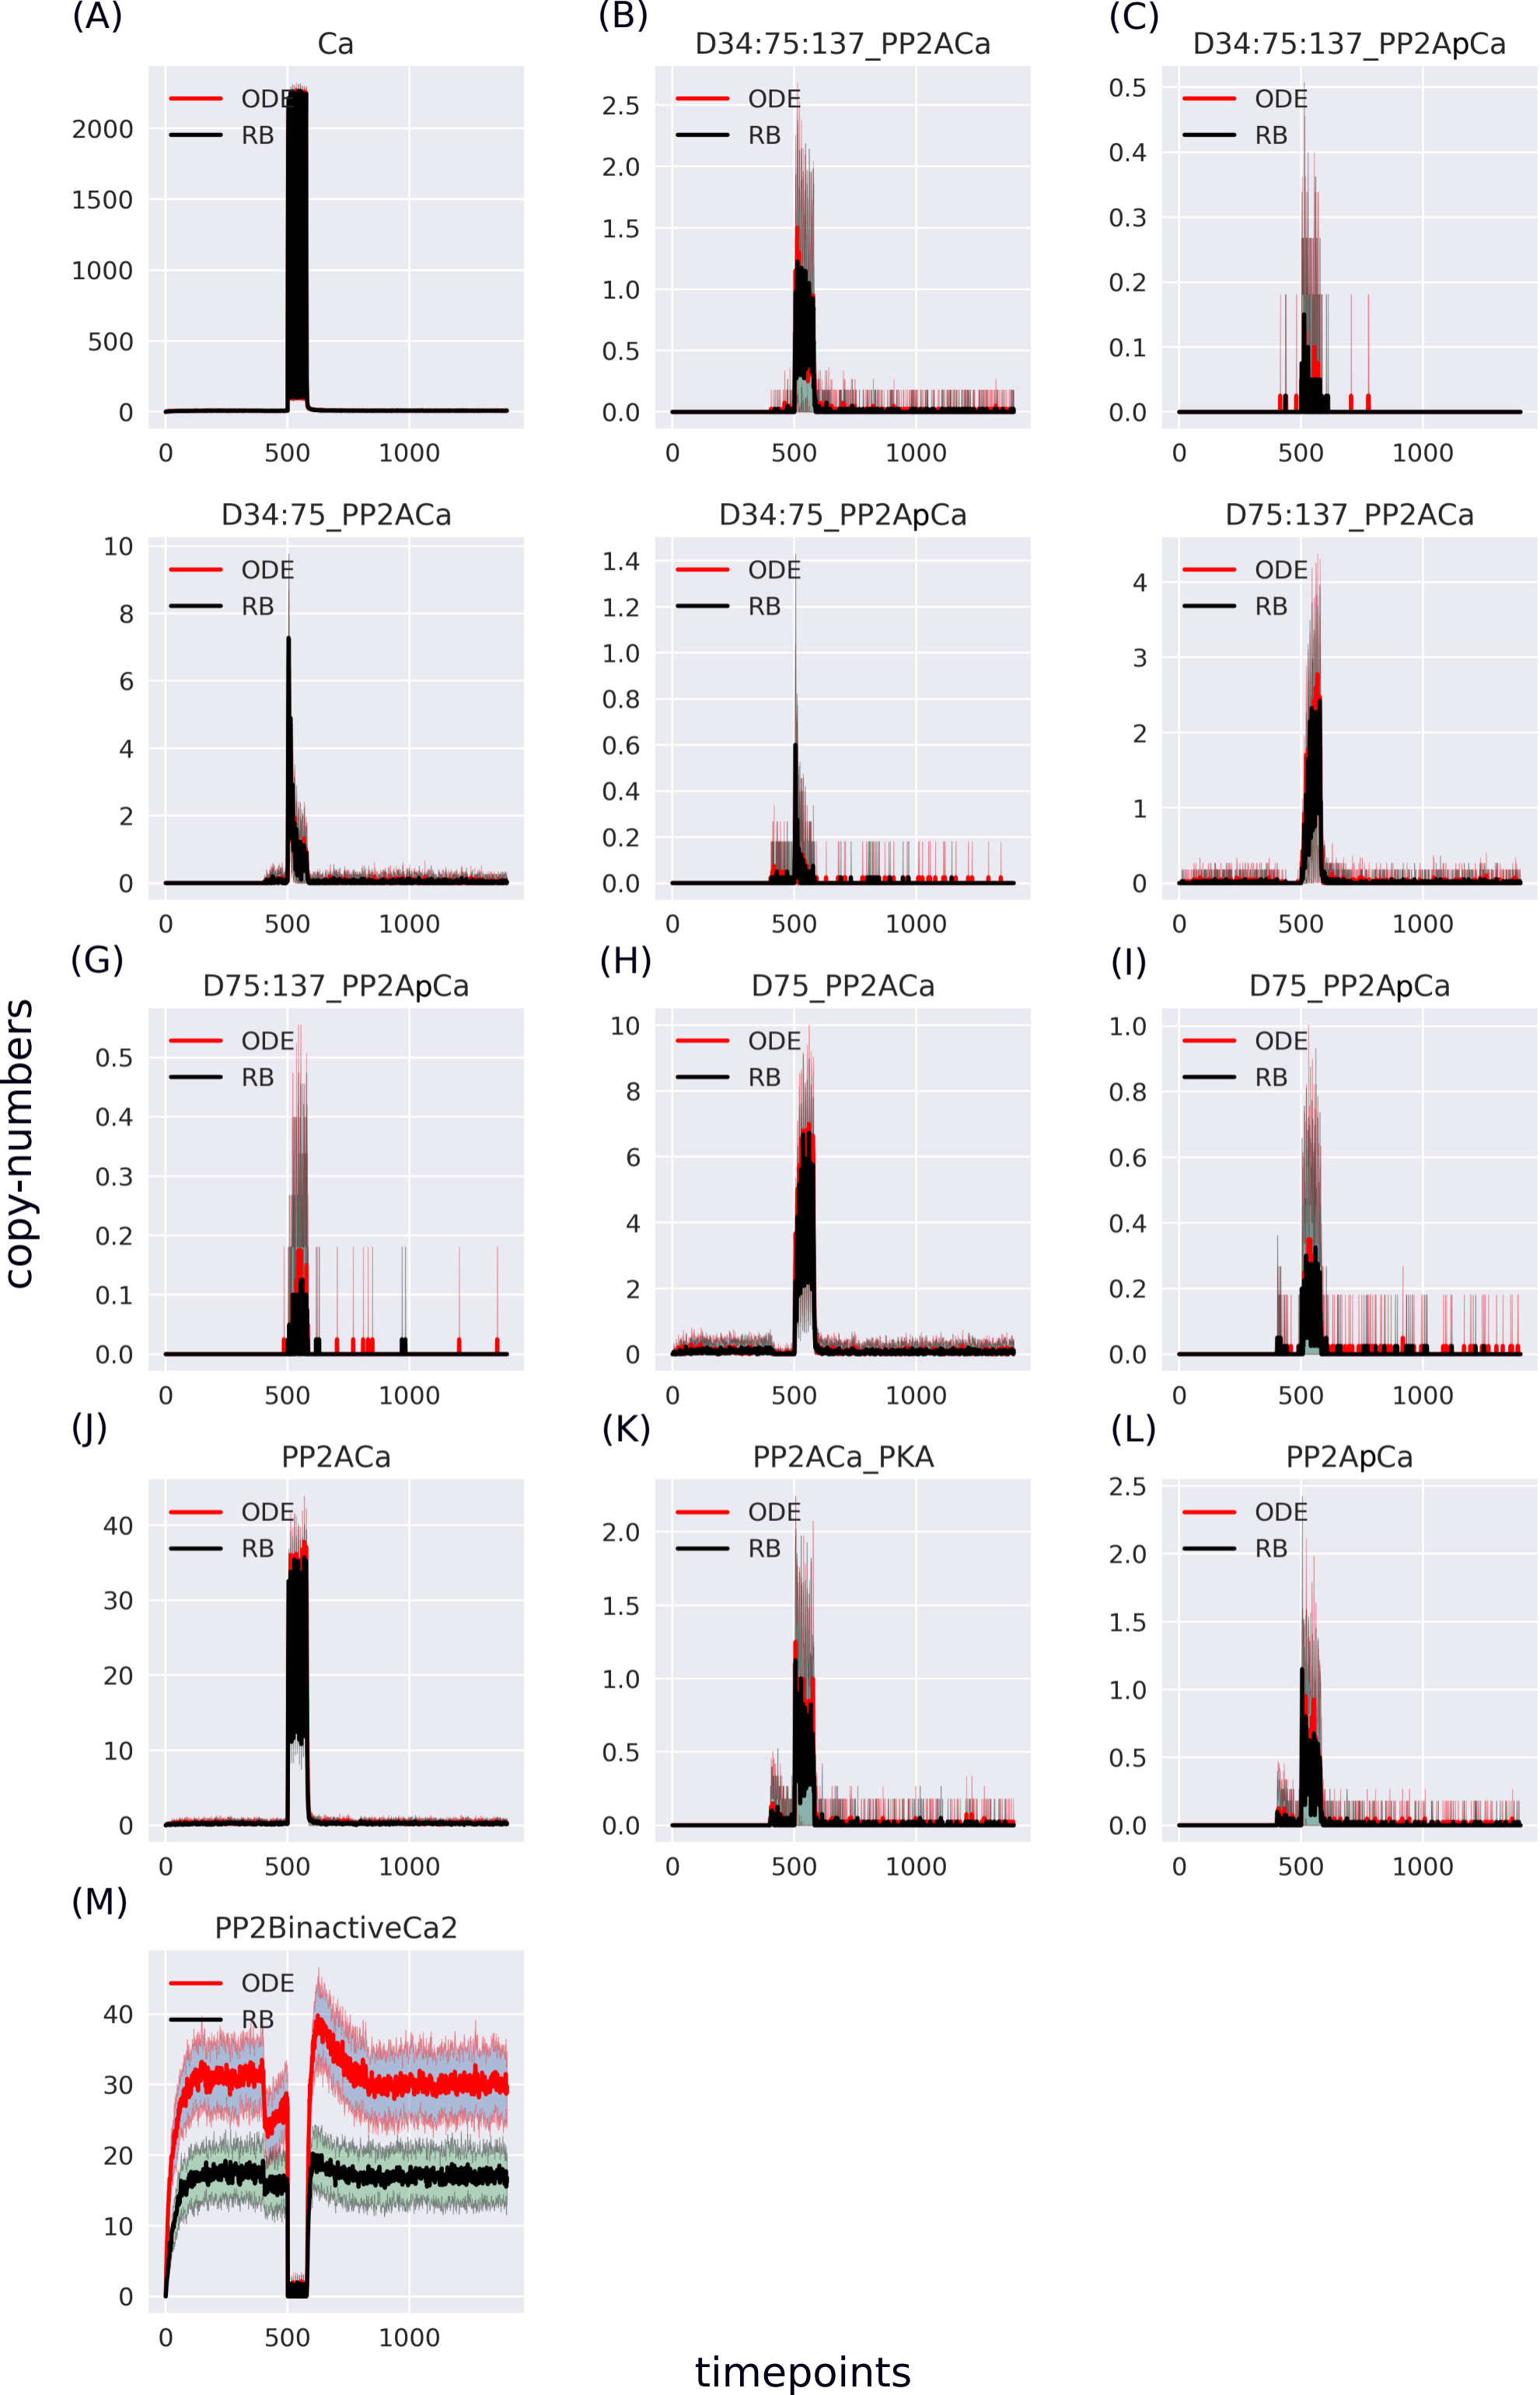

Supplement: Figure_S3.pdf [file Figure_S3.pdf]
