# Supplementary material for: Comparison of rule- and ordinary differential equation-based dynamic model of DARPP-32 signalling network
Source: PeerJ journal article supplement (doi:10.7717/peerj.14516), 2022-12-15
Supplement: Table_S1.pdf [file Table_S1.pdf]

| RB          | ODE        | Definition                                                                                                       |
|-------------|------------|------------------------------------------------------------------------------------------------------------------|
| cAMP*       | cAMP       | cAMP binding unspecified                                                                                         |
| free_Ca*    | free_Ca    | Ca <sup>2+</sup> unbound                                                                                         |
| all_Ca*     | all_Ca     | Ca <sup>2+</sup> binding unspecified                                                                             |
| PKA*        | PKA        | PKA binding unspecified                                                                                          |
| CDK5_*      | _CDK5      | CDK5 bound                                                                                                       |
| CK1u*       | CK1u       | CK1 unphosphorylated, binding unspecified                                                                        |
| PP2Ap*      | PP2Ap      | PP2A phosphorylated, all bindings unspecified                                                                    |
| PP2ACa*     | PP2ACa     | PP2A bound to Ca <sup>2+</sup> , phosphorylation and other bindings unspecified                                  |
| PP2C_*      | _PP2C      | PP2C bound                                                                                                       |
| PP2Bactive* | PP2Bactive | PP2B active, binding unspecified                                                                                 |
| PDEp*       | PDEp       | PDE phosphorylated, binding unspecified                                                                          |
| D*          | D          | DARPP-32 unphosphorylated at all sites, binding unspecified                                                      |
| D34*        | D34        | DARPP-32 phosphorylated at Thr34 with unspecified binding, other sites' internal states and binding unspecified  |
| D75*        | D75        | DARPP-32 phosphorylated at Thr75 with unspecified binding, other sites' internal states and binding unspecified  |
| D137*       | D137       | DARPP-32 phosphorylated at Ser137 with unspecified binding, other sites' internal states and binding unspecified |
